# Supplementary material
Source: PubMed Central journal article supplement (PMC10280323)
Supplement: Supplementary_Data.pdf [file Supplementary_Data.pdf]

**Table SI.** Sequence of miR-140-3p mimic/inhibitor, si-TRAF2 and their NCs.

| <b>RNA molecule</b>  | <b>Sequence 5'-3'</b> |
|----------------------|-----------------------|
| si-TRAF2-1 sense     | GGACCAAGACAAGAUUGAATT |
| si-TRAF2-1 antisense | UUCAUUCUUGUCUUGGUCCTT |
| si-TRAF2-2 sense     | CCAAGAUGGAGGCAAAGAATT |
| si-TRAF2-2 antisense | UUCUUUGCCUCCAUCUUGGTT |
| si-TRAF2-3 sense     | GAGUUAUUAAACCAUUCAATT |
| si-TRAF2-3 antisense | UUGAAUGGUUAAUAACUCTT  |
| si-NC                | UUCUCCGAACGUGUCACGUTT |
| Mimic NC             | GAAGCCGUCCUGAAGCAAGCA |
| Mimic                | UACCACAGGGUAGAACCACGG |
| Inhibitor NC         | CAGUACUUUUGUGUAGUACAA |
| Inhibitor            | CCGTGGTTCTACCCTGTGGTA |

miR, microRNA; TRAF2, tumor necrosis factor receptor-associated factor 2; si, small interfering RNA;

NC, negative control.

**Table SII.** Sequences of miR-140-3p, TRAF2,  $\beta$ -actin and U6 primers for RT-qPCR.

| <b>Primers</b> | <b>Sequence, 5'-3'</b>           |
|----------------|----------------------------------|
| SNHG12         | F: TCTGGTGATCGAGGACTTCC          |
| SNHG12         | R: ACCTCCTCAGTATCACACACT         |
| miR-140-3p     | F: ACACTCCAGCTGGGUACCACAGGGUAGAA |
| miR-140-3p     | R: CTCAACTGGTGTCTGTGGA           |
| TRAF2          | F: GCATACCCGCCATCTTCTC           |
| TRAF2          | R: CGTTCAGGTAGATACGCAGACA        |
| $\beta$ -actin | F: AGCGAGCATCCCCAAAGTT           |
| $\beta$ -actin | R: GGGCACGAAGGCTCATCATT          |
| U6             | F: CTCGCTTCGGCAGCACA             |
| U6             | R: AACGCTTCACGAATTTGCGT          |

miR, microRNA; TRAF2, tumor necrosis factor receptor associated factor 2; F, forward; R, reverse.
